# Supplementary material
Source: PubMed Central journal article supplement (PMC4105081)
Supplement: ja411950n_si_001.pdf [file ja411950n_si_001.pdf]

**Synthesis and Non-Enzymatic Template-Directed  
Polymerization of 2'-Amino-2'-Deoxythreose Nucleotides**

J. Craig Blain, Alonso Ricardo and Jack W. Szostak\*

*Howard Hughes Medical Institute and Department of Molecular Biology and Center for  
Computational and Integrative Biology, Massachusetts General Hospital, 185  
Cambridge Street, Boston, Massachusetts 02114, USA*

\*Email: [szostak@molbio.mgh.harvard.edu](mailto:szostak@molbio.mgh.harvard.edu)

## Supporting Information

**Scheme S1.** Synthesis of the activated 2'-NH<sub>2</sub>-TNA nucleotide 2-MeImpntG.

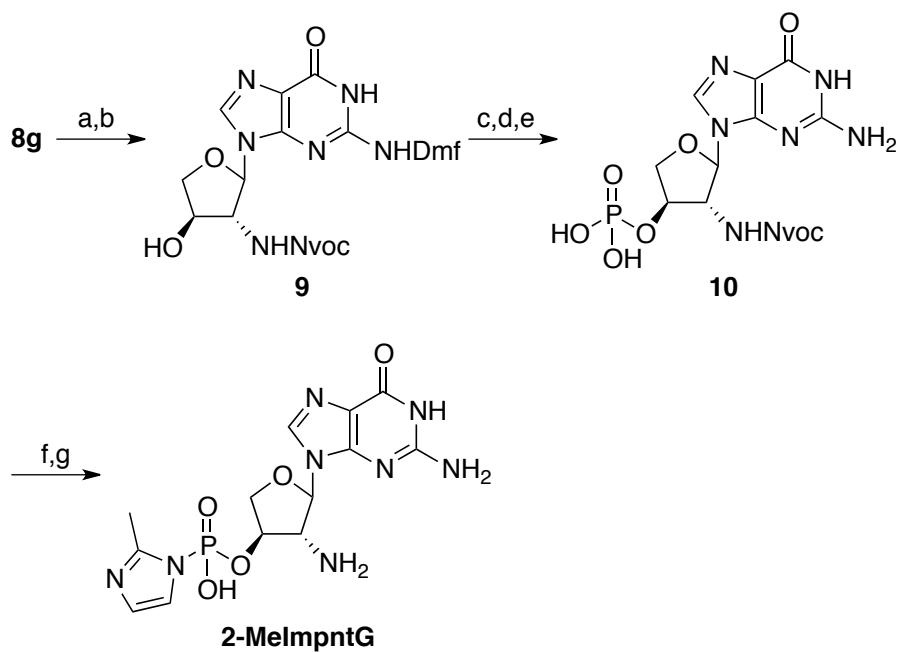

<sup>a</sup>Reagents and conditions: (a) 4,5-dimethoxy-2-nitrobenzyl chloroformate, *N,N*-diisopropylethylamine, DMF, 20 °C, 3.5 h; (b) *N,N*-dimethylformamide dimethyl acetal, DMF, 20 °C, 6 h, 50%; (c) bis(2-cyanoethyl)-*N,N*-diisopropyl phosphoramidite, 5-(ethylthio)tetrazole, *N,N*-diisopropylethylamine, CH<sub>3</sub>CN, 20 °C, 2.7 h; (d) *tert*-butyl hydroperoxide, 20 °C, 1.3 h; (e) NH<sub>4</sub>OH, 55 °C, 18 h; (f) 2-methylimidazole, Et<sub>3</sub>N, triphenylphosphine, 2,2'-dipyridyl disulfide, 3:2 DMSO-DMF, 20 °C, 3 h; (g) 350 nm irradiation, H<sub>2</sub>O pH 10.5, 4 °C, 16.5 h, 6% from **9**.

## Supporting Information

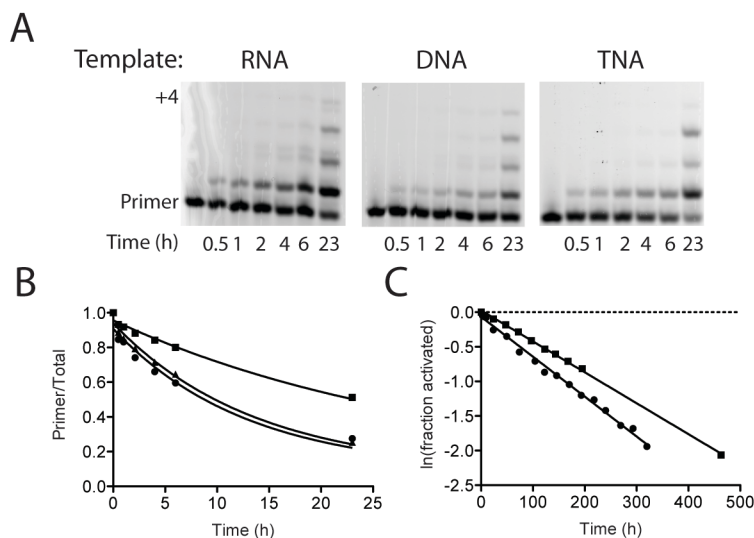

**Figure S1.** Non-enzymatic primer extension and hydrolysis of 2-MeImpntG in the absence of *N*-(hydroxyethyl)imidazole (HEI). (A) PAGE analysis of the products of the primer extension reaction. The conditions for the reaction are equivalent to those of Figure 4, except for the absence of HEI. (B) Plot of the amount of primer remaining as a fraction of the total lane integration against time for the RNA (●), DNA (■) and TNA (▲) templates. The plot was fit to a single exponential with a plateau fixed at 0.086, the average observed in Figure 4B, to measure pseudo-first order rate constants of  $7.8 \times 10^{-2}$ ,  $3.2 \times 10^{-2}$ , and  $7.4 \times 10^{-2} \text{ h}^{-1}$  for the RNA, DNA and TNA templates, respectively. (C) Plot of the hydrolysis of 2-MeImpntG (■) and guanosine 5'-phosphor-2-methylimidazolide (2-MeImpG) (●) measured by  $^{31}\text{P}$  NMR with 100 mM HEPES pH 7.5, 5 mM potassium phosphate reference, and 10%  $\text{D}_2\text{O}$  at 20 °C. The natural logarithm of the fraction of activated nucleotide remaining was fit to a line; the slope yielded pseudo-first order rate constants of  $4.5 \times 10^{-3}$  and  $5.8 \times 10^{-3} \text{ h}^{-1}$  for 2-MeImpntG and 2-MeImpG, respectively.

## Supporting Information

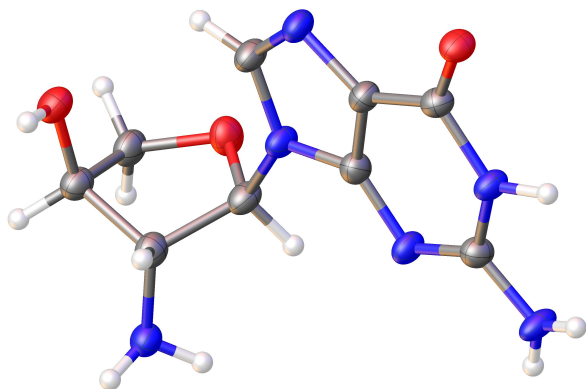

**Figure S2.** Thermal ellipsoid representation of the x-ray crystal structure of nucleoside **8g**.

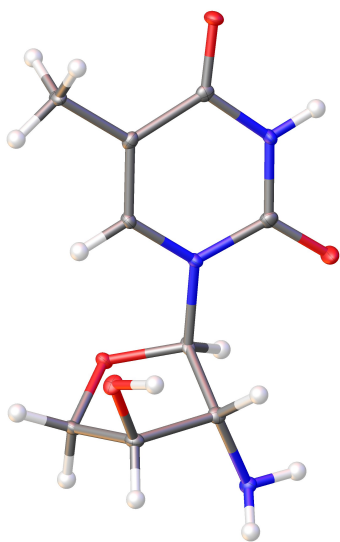

**Figure S3.** Thermal ellipsoid representation of the x-ray crystal structure of nucleoside **8t**.

## Supporting Information

### *Primer extension reactions in the absence of HEI*

Primer extension reactions in the absence of HEI were carried out in the same manner as in the presence of HEI except that HEI was omitted, time points were taken at 0.5, 1, 2, 4, 6 and 23 h, and the plateau for the fit of primer consumption to an exponential decay was fixed at 0.086, the average plateau observed in the presence of HEI.

### *Hydrolysis of 2-MeImpntG and 2-MeImpG in the absence of HEI*

The 2-MeImpG monomer was synthesized as previously described<sup>1</sup> and purified as per 2-MeImpntG. Hydrolysis was measured under the following conditions: 3 mM 2-MeImpntG or 5 mM 2-MeImpG, 100 mM HEPES pH 7.5, 5 mM potassium phosphate reference, and 10% D<sub>2</sub>O at 20 °C. Time points were taken over the course of 19 days. At each time point a <sup>31</sup>P NMR spectrum was measured and analyzed as described for hydrolysis in the presence of HEI, with the 2-MeImpG signal appearing at -10.40 ppm and the GMP signal appearing at 1.48 ppm.

### *X-ray crystallography of **8t***

An analytical sample of **8t** was crystallized from water with ethanol vapor diffusion. Data was collected from a crystal mounted on a diffractometer at 100 K. The intensities of the reflections were collected by means of a Bruker APEX II CCD along with the D8 Diffractometer (30 KeV,  $\lambda = 0.413280 \text{ \AA}$ ), and equipped with an Oxford Cryosystems nitrogen open flow apparatus. The collection method involved 0.5° scans in Phi at -5° in 2 $\theta$ . Data integration down to 0.82 Å resolution was carried

## Supporting Information

out using SAINT V7.46 A (Bruker diffractometer, 2009) with reflection spot size optimization. Absorption corrections were made with the program SADABS (Bruker diffractometer, 2009). The structure was solved by the direct methods procedure refined by least-squares methods against  $F^2$  using SHELXS-97 and SHELXL-97 (Sheldrick, 2008). Non-hydrogen atoms were refined anisotropically, and hydrogen atoms were allowed to ride on their respective heteroatoms.

This data was collected at the Advanced Photon Source (APS). We thank Dr. Yu-Sheng Chen at ChemMatCARS, APS, for his assistance with single-crystal data. ChemMatCARS Sector 15 is principally supported by the National Science Foundation/Department of Energy under grant number NSF/CHE-0822838. Use of the Advanced Photon Source was supported by the U.S. Department of Energy, Office of Science, Office of Basic Energy Sciences, under Contract No. DE-AC02-06CH11357.

### *X-ray crystallography of **8g***

An analytical sample of **8g** was crystallized from water with ethanol vapor diffusion. Data was collected from a crystal mounted on a diffractometer at 100 K. The intensities of the reflections were collected by means of a Bruker APEX II DUO CCD diffractometer ( $\text{Cu}_K$  radiation,  $\lambda = 1.54178 \text{ \AA}$ ), and equipped with an Oxford Cryosystems nitrogen flow apparatus. The collection involved  $1.0^\circ$  scans in  $\omega$  at  $30$ ,  $55$ ,  $80$  and  $105^\circ$  in  $2\theta$ . Data analysis was carried out as per **8t**.

### *Synthesis of 2-MelmpntG*

## Supporting Information

**4,5-Dimethoxy-2-nitrobenzyl ((3*R*,4*R*)-2-(2-(((*E*)-(dimethylamino)methylene)amino)-6-oxo-1,6-dihydro-9*H*-purin-9-yl)-4-hydroxytetrahydrofuran-3-yl)carbamate (9).** Nucleoside **8g** was dissolved in anhydrous DMF (10 mL) under argon. To this solution was added *N,N*-diisopropylethylamine (0.11 mL, 632  $\mu$ mol) and then 4,5-dimethoxy-2-nitrobenzyl chloroformate (58 mg, 210  $\mu$ mol) and the reaction was stirred at room temperature, protected from light, for 3.5 h. The reaction was quenched with MeOH (2 mL) for 1 h and then concentrated *in vacuo* and coevaporated with toluene (2x10 mL). The crude was dissolved in anhydrous DMF (5 mL) under argon and to this solution was added *N,N*-dimethylformamide dimethyl acetal (1 mL, 7.53 mmol) and the reaction was stirred, protected from light, at room temperature for 6 h. The reaction was concentrated *in vacuo* and coevaporated with toluene (2x10 mL) and the crude was purified by flash chromatography (5 to 40% MeOH in CH<sub>2</sub>Cl<sub>2</sub>) to afford protected nucleoside **9** as a pale yellow solid (49 mg, 50%).  $R_f$  = 0.4, 10% MeOH in CH<sub>2</sub>Cl<sub>2</sub>; <sup>1</sup>H NMR (400 MHz, DMSO-d<sub>6</sub>)  $\delta$  11.35 (s, 1H, HN-N1), 8.62 (s, 1H, H-C=N), 8.08 (d,  $J$  = 8.2 Hz, 1H, H-N-Nvoc), 7.98 (s, 1H, H-C8), 7.70 (s, 1H, H-Ar), 7.15 (s, 1H, H-Ar), 5.82 (d,  $J$  = 3.9 Hz, 1H, H-C1'), 5.73 (d,  $J$  = 3.8 Hz, 1H, H-OC3'), 5.35 (d,  $J$  = 15.0 Hz, 1H, H-HC-Ar), 5.31 (d,  $J$  = 14.4 Hz, 1H, H-HC-Ar), 4.59 (m, 1H, H-C2'), 4.31 (m, 1H, H-C3'), 4.16-3.96 (m, 2H, H-C4'), 3.87 (s, 6H, H<sub>3</sub>-COAr), 3.10 (s, 3H, H<sub>3</sub>-C-N), 3.02 (s, 3H, H<sub>3</sub>-C-N); ESI-MS ( $m/z$ ): [M+Na<sup>+</sup>]<sup>+</sup> calc. for C<sub>22</sub>H<sub>26</sub>N<sub>8</sub>O<sub>9</sub>, 569.2, obs. 569.1.

**4,5-Dimethoxy-2-nitrobenzyl ((3*R*,4*R*)-2-(2-amino-6-oxo-1,6-dihydro-9*H*-purin-9-yl)-4-(phosphonoxy)tetrahydrofuran-3-yl)carbamate (10).** Protected nucleoside **9** was dissolved in anhydrous acetonitrile (8 mL) with 3 Å

## Supporting Information

molecular sieves (10) under argon. To this solution was added 5-(ethylthio)tetrazole (20 mg, 154  $\mu\text{mol}$ ) and then bis(2-cyanoethyl)-*N,N*-diisopropyl phosphoramidite (28 mg, 103  $\mu\text{mol}$ ) and the reaction was stirred at room temperature for 2.7 h protected from light. To the reaction was added a 70% aqueous solution of *tert*-butyl hydroperoxide (200  $\mu\text{L}$ , 1.45 mmol) and the reaction was stirred for another 1.3 h. Finally, the reaction was diluted with ammonium hydroxide (15 mL) and stirred at 55 °C in a pressure vessel for 18 h. The reaction was concentration *in vacuo* and purified by preparative HPLC with 2 to 15% acetonitrile in 10 mM triethylammonium bicarbonate pH 7.5 over 15 min to afford 90 mg of the protected nucleotide **10** as a triethylammonium salt after lyophilization. Due to excess triethylammonium the actual yield of the reaction was not determined and the product was used directly in the subsequent activation reaction.  $^1\text{H}$  NMR (400 MHz, DMSO- $d_6$ )  $\delta$  10.63 (s, 1H, H-N1), 8.35 (d,  $J$  = 6.9 Hz, 1H, H-N-Nvoc), 7.99 (s, 1H, H-C8), 7.69 (s, 1H, H-Ar), 7.15 (s, 1H, H-Ar), 5.73 (d,  $J$  = 4.8 Hz, 1H, H-C1'), 5.33 (d,  $J$  = 14.7 Hz, 1H, H-HC-Ar), 5.28 (d,  $J$  = 14.3 Hz, 1H, H-HC-Ar), 4.69 (m, 1H, H-C2'), 4.54 (m, 1H, H-C3'), 4.12 (dd,  $J$  = 9.1, 4.4 Hz, H-C4'), 4.07 (dd,  $J$  = 9.1, 5.2 Hz, H-C4'), 3.88 (s, 3H, H<sub>3</sub>-COAr), 3.86 (s, 3H, H<sub>3</sub>-COAr);  $^{13}\text{P}$  NMR (160.8 MHz, DMSO- $d_6$ )  $\delta$  0 (phosphoric acid), -1.12; ESI-MS ( $m/z$ ):  $[\text{M}-\text{H}^+]^-$  calc. for C<sub>19</sub>H<sub>22</sub>N<sub>7</sub>O<sub>12</sub>P, 570.1, obs. 570.1.

**9-(2'-Amino-2'-deoxy- $\alpha$ -L-threofuranosyl)guanine 3'-phosphor-2-methylimidazole (2-MeImpntG).** Protected nucleotide **10** was dissolved in a mixture of DMSO (3 mL) and DMF (2 mL) under argon and protected from light. To this solution was added 2-methylimidazole (181 mg, 2.21 mmol), triethylamine (0.1 mL,



## Supporting Information

717  $\mu\text{mol}$ ), triphenylphosphine (129 mg, 492  $\mu\text{mol}$ ), and finally 2,2'-dipyridyl disulfide (150 mg, 681  $\mu\text{mol}$ ) and the reaction was stirred at room temperature for 3 h. The reaction was precipitated in a mixture of acetone (300 mL), diethyl ether (190 mL), triethylamine (20 mL) and an acetone solution saturated with sodium perchlorate (1.5 mL). The precipitate was collected by centrifugation and washed with a 1:1 acetone-ether mixture (3x40 mL). The crude pellet was dissolved in water brought to pH 10.5 with 10 N NaOH. This solution was stirred under constant 350 nm irradiation for 16.5 h. The product was purified directly from the reaction solution by preparative HPLC with 2 to 9% acetonitrile in 10 mM triethylammonium bicarbonate pH 7.5 over 12 min to afford the product as a triethylammonium salt after lyophilization. The yield of activated nucleotide 2-MeImpntG was measured by the UV spectrophotometry, assuming an extinction coefficient of  $14.09 \text{ mM}^{-1} \text{ cm}^{-1}$ , and found to be 4  $\mu\text{mol}$  (6% from **9**).  $^1\text{H}$  NMR (400 MHz,  $\text{D}_2\text{O}$ )  $\delta$  7.90 (s, 1H, H-C8), 7.06 (app s, 1H, H-Im), 6.82 (app s, 1H, H-Im), 5.77 (app s, 1H, H-C1'), 4.59 (under  $\text{D}_2\text{O}$ , H-C3'), 4.47 (d,  $J = 11.1 \text{ Hz}$ , 1H, H-C4'), 4.36 (d,  $J = 10.9 \text{ Hz}$ , 1H, H-C4'), 3.70 (app s, 1H, H-C2'), 3.21 (q,  $J = 7.3 \text{ Hz}$ , 0.6x6H,  $\text{NH}(\text{CH}_2\text{CH}_3)_3^+$ ), 2.20 (s, 3H,  $\text{H}_3\text{-C}$ ), 3.21 (t,  $J = 7.3 \text{ Hz}$ , 0.6x9H,  $\text{NH}(\text{CH}_2\text{CH}_3)_3^+$ );  $^{13}\text{C}$  NMR (100 MHz,  $\text{DMSO-d}_6$ )  $\delta$  160.1, 158.8, 153.6, 150.3, 137.0, 121.2, 90.9, 80.2, 74.6, 61.4, 13.7;  $^{31}\text{P}$  NMR (160.8 MHz, 10%  $\text{D}_2\text{O}$ )  $\delta$  1.15 (hydrolyzed), 0 (orthophosphate), -12.02 (activated); HRMS ( $m/z$ ):  $[\text{M-H}^+]$  calc. for  $\text{C}_{13}\text{H}_{17}\text{N}_8\text{O}_5\text{P}$ , 395.0987, obs. 395.0972.

## References

- (1) Joyce, G. F.; Inoue, T.; Orgel, L. E. *J. Mol. Biol.* **1984**, 176, 279–306.
